# Supplementary material
Source: publisher figshare collection journal article supplement (https://acs.figshare.com/ndownloader/files/3820039)

## **SUPPORTING INFORMATION**

### ***In vitro* human metabolism of the flame retardant resorcinol bis- (diphenylphosphate) (RDP)**

Ana Ballesteros-Gómez<sup>†,§,\*</sup>, Nele Van den Eede<sup>†</sup>, Adrian Covaci<sup>†\*</sup>

<sup>†</sup>Toxicological Center, University of Antwerp, Universiteitsplein 1, 2610 Antwerp, Wilrijk, Belgium

**\* Corresponding authors:**

E-mail: a.m.ballesterosgomez@gmail.com and adrian.covaci@uantwerpen.be

Toxicological Center, University of Antwerp, Universiteitsplein 1, 2610 Wilrijk, Belgium

§ - present address: Institute for Environmental Studies (IVM), VU University, De Boelelaan 1087, 1081 HV Amsterdam, the Netherlands

**No of pages: 9**

**No of tables: 2**

**No of figures: 5**

## Sample preparation

The following procedures were investigated: a) common solvents for liquid-liquid extraction after HLM incubations reported for other FRs (ethyl acetate, methyl-tert-butylether, MTBE:hexane 1:1 v/v); b) anion exchange solid-phase extraction (SPE) as previously reported for the analysis of PFR metabolites in urine and c) salting-out extraction in mixtures acetonitrile:water with ammonium acetate. Clean-up/concentration experiments were made in duplicate with 0.2 mg/mL HLM, 20  $\mu$ M RDP and 30 min incubations. Reactions were stopped with 1 mL of cold acetonitrile and in ice (1 min) or only in ice (1 min) for subsequent SPE. HLMs were immediately removed by centrifugation (30 s, 8000 rpm) prior to clean-up. For solvent clean-up, two extraction steps with 4 mL of solvent (vortex stirring for 1 min) were carried out in 10 mL glass tubes and the final extracts combined, evaporated to dryness ( $N_2$ , 40°C) and reconstituted in 150  $\mu$ L of methanol. Extracts were finally centrifuged (30 s, 8000 rpm) before analysis. For the salting-out clean-up, an amount of 155 mg of ammonium acetate was added to the mixture of water:acetonitrile 1:1 v/v obtained after stopping the incubation and the extraction done by vortex-mixing for 1 min. This amount of salt was equivalent to around 2 M of salt in water and was selected based on common concentrations used for salting-out procedures with water:acetonitrile in the literature. Two additional extraction steps with 0.8 mL of acetonitrile each were carried out in the 2 mL Eppendorf. The final extracts were combined, evaporated to dryness ( $N_2$ , 40°C) and reconstituted in 150  $\mu$ L of methanol. Extracts were finally centrifuged (30 s, 8000 rpm) before analysis.

Figure S-3 shows the apparent recoveries of some RDP metabolites and compounds under the different sample preparation procedures. Both, ethyl acetate and acetonitrile salting-out extractions gave good apparent recoveries for a wider polarity range of compounds, despite the lower solvent volume (3 mL instead of 8 mL) used for the latter. However, cleaner extracts were observed with acetonitrile in comparison with the three other solvent procedures that yielded turbid extracts after evaporation and reconstitution in methanol. This was probably due the co-extraction of non-polar matrix components with low solubility in methanol. These co-extracted matrix components could be anyway mostly separated by precipitation in the final centrifugation step. Furthermore, we selected the salting-out procedure as optimal due to the lower consumption of organic solvent and materials and the simplicity of the procedure. This sample preparation was also suitable for glucuronidated and sulfated metabolites, despite of their higher polarity.

**Table S-1.** RDP metabolites and hydrolysis products identified in this study: molecular formula, accurate mass, QTOF measured mass errors, retention times (RT) and QQQ-MS main transitions

| Compound                                               | Molecular formula<br>(parent compound)                           | <sup>c</sup> RT<br>(min) | QQQ Transition<br>(m/z) |
|--------------------------------------------------------|------------------------------------------------------------------|--------------------------|-------------------------|
| <b>Metabolites</b>                                     |                                                                  |                          |                         |
| <b>Hydroxy metabolites</b>                             |                                                                  |                          |                         |
| <sup>a</sup> <i>para</i> -HO-TPHP                      | C <sub>18</sub> H <sub>15</sub> O <sub>5</sub> P                 | 5.1                      | 341.1-249.1             |
| <sup>a</sup> di-HO-TPHP                                | C <sub>18</sub> H <sub>15</sub> O <sub>6</sub> P                 | 4.6                      | 357.1-249.1             |
| <sup>a</sup> HO-RDP (1)                                | C <sub>30</sub> H <sub>24</sub> O <sub>9</sub> P <sub>2</sub>    | 7.5                      | 589.1-497.1             |
| <sup>a</sup> di-HO-RDP                                 | C <sub>30</sub> H <sub>24</sub> O <sub>10</sub> P <sub>2</sub>   | 6.9                      | 605.1-497.1             |
| <sup>a</sup> HO-RDPn2 (1)                              | C <sub>42</sub> H <sub>33</sub> O <sub>13</sub> P <sub>3</sub>   | 8.8                      | 837.1-93.0              |
| <b>Sulfated and glucuronidated metabolites</b>         |                                                                  |                          |                         |
| <sup>a</sup> Resorcinyll sulfate                       | C <sub>6</sub> H <sub>6</sub> O <sub>5</sub> S                   | 4.0                      | 188.9-109.0             |
| <sup>a</sup> Phenyl sulfate                            | C <sub>6</sub> H <sub>6</sub> O <sub>4</sub> S                   | 5.3                      | 172.9-93.0              |
| <sup>a</sup> TPHP sulfate                              | C <sub>18</sub> H <sub>15</sub> O <sub>8</sub> PS                | 17.3                     | 421.0-249.1             |
| <sup>a</sup> HO-TPHP sulfate (1)                       | C <sub>18</sub> H <sub>15</sub> O <sub>9</sub> PS                | 17.1                     | 437.0-249.1             |
| <sup>a</sup> HO-TPHP sulfate (2)                       | C <sub>18</sub> H <sub>15</sub> O <sub>9</sub> PS                | 17.3                     | 437.0-249.1             |
| <sup>a</sup> RDP sulfate                               | C <sub>30</sub> H <sub>24</sub> O <sub>13</sub> P <sub>2</sub> S | 19.4                     | 685.0-497.1             |
| <sup>a</sup> HO-RDP sulfate                            | C <sub>30</sub> H <sub>24</sub> O <sub>12</sub> P <sub>2</sub> S | 19.3                     | 669.0-497.1             |
| <sup>a</sup> TPHP glucuronide                          | C <sub>24</sub> H <sub>23</sub> O <sub>11</sub> P                | 16.8                     | 517.1-249.1             |
| <sup>a</sup> RDP glucuronide                           | C <sub>36</sub> H <sub>32</sub> O <sub>15</sub> P <sub>2</sub>   | 15.0                     | 765.1-249.1             |
| <sup>a</sup> HO-TPHP glucuronide (1)                   | C <sub>24</sub> H <sub>23</sub> O <sub>12</sub> P                | 16.6                     | 533.1-249.1             |
| <sup>a</sup> HO-TPHP-HO glucuronide (2)                | C <sub>24</sub> H <sub>23</sub> O <sub>12</sub> P                | 16.8                     | 533.1-249.1             |
| <sup>a</sup> HO-RDP-HO glucuronide (1)                 | C <sub>36</sub> H <sub>32</sub> O <sub>16</sub> P <sub>2</sub>   | 19.1                     | 781.1-497.1             |
| <sup>a</sup> HO-RDP-HO glucuronide (2)                 | C <sub>36</sub> H <sub>32</sub> O <sub>16</sub> P <sub>2</sub>   | 19.2                     | 781.1-497.1             |
| <b>Compounds and hydrolysis products or impurities</b> |                                                                  |                          |                         |
| <sup>b</sup> TPHP                                      | C <sub>18</sub> H <sub>15</sub> O <sub>4</sub> P                 | 7.0                      | 327.1-152.1             |
| <sup>b</sup> RDP                                       | C <sub>30</sub> H <sub>24</sub> O <sub>8</sub> P <sub>2</sub>    | 8.8                      | 575.1-481.1             |
| <sup>b</sup> RDPn2                                     | C <sub>42</sub> H <sub>33</sub> O <sub>12</sub> P <sub>3</sub>   | 9.9                      | 823.1-481.1             |
| <sup>a,c</sup> RDP-[Phe]                               | C <sub>24</sub> H <sub>20</sub> O <sub>8</sub> P <sub>2</sub>    | 3.8                      | 497.1-249.0             |
| <sup>a</sup> <i>meta</i> -HO-TPHP                      | C <sub>18</sub> H <sub>15</sub> O <sub>5</sub> P                 | 5.3                      | 341.1-249.0             |
| <sup>a</sup> <i>meta</i> -HO-RDP                       | C <sub>30</sub> H <sub>24</sub> O <sub>9</sub> P <sub>2</sub>    | 7.7                      | 589.1-497.1             |
| <sup>a</sup> <i>meta</i> -HO-RDPn2                     | C <sub>42</sub> H <sub>33</sub> O <sub>13</sub> P <sub>3</sub>   | 9.0                      | 837.1-93.0              |
| <sup>a</sup> DPHP                                      | C <sub>12</sub> H <sub>11</sub> O <sub>4</sub> P                 | 2.9                      | 249.1-155.1             |
| <sup>b</sup> TPHP-d <sub>15</sub>                      | C <sub>18</sub> D <sub>15</sub> O <sub>4</sub> P                 | 6.9                      | 342.1-82.0              |

ESI source parameters: gas temperature 320 °C; gas flow 8 L min<sup>-1</sup>; nebulizer 40 psi, sheat gas heater 250, sheat gas flow 11, capillary 4000 V, Nozzle voltage 500. MS parameters: Frag. 120 V; CE 25 V; Cell Ac. 7 V; dwell time 50 ms. ESI polarity <sup>a</sup>negative mode, <sup>b</sup>positive mode. <sup>c</sup>LC methods conditions for Phase I and hydrolysis products and for Phase II metabolites were different and are explained in the manuscript. <sup>c</sup>Metabolite corresponding to RDP with the loss of a phenyl group. Abbreviations: diphenyl phosphate, DPHP; triphenyl phosphate, TPHP; RDP dimer, RDPn2.

**Table S-2.** Identification of metabolites and hydrolysis products of RDP by LC-ESI-QTOF

| Compound                                 | Formula                                                          | Target mass | Ions ESI (-)                                                                        | Ions ESI (+)                              | Mass error (ppm) ESI(-) | Mass error (ppm) ESI(+) | Identification method |
|------------------------------------------|------------------------------------------------------------------|-------------|-------------------------------------------------------------------------------------|-------------------------------------------|-------------------------|-------------------------|-----------------------|
| <b>Hydrolysis products or impurities</b> |                                                                  |             |                                                                                     |                                           |                         |                         |                       |
| DPHP                                     | C <sub>12</sub> H <sub>11</sub> O <sub>4</sub> P                 | 250.0395    | [M-H] <sup>-</sup>                                                                  | [M+H] <sup>+</sup>                        | -3.54                   | 5.58                    | <sup>a</sup> Meteor   |
| <sup>b</sup> RDP-[Phe]                   | C <sub>24</sub> H <sub>20</sub> O <sub>8</sub> P <sub>2</sub>    | 498.0633    | [M-H] <sup>-</sup>                                                                  | [M+H] <sup>+</sup><br>[M+Na] <sup>+</sup> | -4.35                   | -2.83                   | <sup>a</sup> Meteor   |
| <i>meta</i> -HO-TPHP                     | C <sub>18</sub> H <sub>15</sub> O <sub>5</sub> P                 | 342.0657    | [M-H] <sup>-</sup><br>[M+HCOO] <sup>-</sup>                                         | [M+H] <sup>+</sup><br>[M+Na] <sup>+</sup> | -4.6                    | -0.02                   | <sup>a</sup> Meteor   |
| <sup>c</sup> RDP-n2-[Phe]                | C <sub>36</sub> H <sub>29</sub> O <sub>12</sub> P <sub>3</sub>   | 746.0872    | [M-H] <sup>-</sup>                                                                  | [M+H] <sup>+</sup><br>[M+Na] <sup>+</sup> | -1.72                   | -2.41                   | <sup>a</sup> Meteor   |
| HO-RDP (2)                               | C <sub>30</sub> H <sub>24</sub> O <sub>9</sub> P <sub>2</sub>    | 590.0896    | [M-H] <sup>-</sup><br>[M+HCOO] <sup>-</sup>                                         | [M+H] <sup>+</sup><br>[M+Na] <sup>+</sup> | -2.89                   | 1.31                    | <sup>a</sup> Meteor   |
| HO-RDPn2 (2)                             | C <sub>42</sub> H <sub>33</sub> O <sub>13</sub> P <sub>3</sub>   | 838.1134    | [M-H] <sup>-</sup>                                                                  | [M+H] <sup>+</sup><br>[M+Na] <sup>+</sup> | 2.46                    | -0.08                   | <sup>a</sup> Meteor   |
| <b>Hydroxy metabolites</b>               |                                                                  |             |                                                                                     |                                           |                         |                         |                       |
| di-HO-TPHP                               | C <sub>18</sub> H <sub>15</sub> O <sub>6</sub> P                 | 358.0606    | [M-H] <sup>-</sup><br>[M+HCOO] <sup>-</sup><br>[M+CH <sub>3</sub> COO] <sup>-</sup> | [M+H] <sup>+</sup>                        | -5.16                   | 0.51                    | untargeted            |
| <i>para</i> -HO-TPHP                     | C <sub>18</sub> H <sub>15</sub> O <sub>5</sub> P                 | 342.0657    | [M-H] <sup>-</sup><br>[M+HCOO] <sup>-</sup>                                         | [M+H] <sup>+</sup><br>[M+Na] <sup>+</sup> | -2.66                   | 0.31                    | Meteor                |
| di-HO-RDP                                | C <sub>30</sub> H <sub>24</sub> O <sub>10</sub> P <sub>2</sub>   | 606.0845    | [M-H] <sup>-</sup>                                                                  | [M-H] <sup>-</sup>                        | 3.79                    | -1.34                   | untargeted            |
| HO-RDP (1)                               | C <sub>30</sub> H <sub>24</sub> O <sub>9</sub> P <sub>2</sub>    | 590.0896    | [M-H] <sup>-</sup><br>[M+HCOO] <sup>-</sup>                                         | [M+H] <sup>+</sup><br>[M+Na] <sup>+</sup> | -3.2                    | -0.29                   | Meteor                |
| HO-RDPn2 (1)                             | C <sub>42</sub> H <sub>33</sub> O <sub>13</sub> P <sub>3</sub>   | 838.1134    | [M-H] <sup>-</sup>                                                                  | [M+H] <sup>+</sup><br>[M+Na] <sup>+</sup> | 1.56                    | 2.32                    | Meteor                |
| <b>Sulfated metabolites</b>              |                                                                  |             |                                                                                     |                                           |                         |                         |                       |
| Phenol sulfate                           | C <sub>6</sub> H <sub>6</sub> O <sub>5</sub> S                   | 189.9936    | [M-H] <sup>-</sup>                                                                  | -                                         | -3.59                   | n.d.                    | untargeted            |
| Resorcynil sulfate                       | C <sub>6</sub> H <sub>6</sub> O <sub>4</sub> S                   | 173.9987    | [M-H] <sup>-</sup>                                                                  | -                                         | -2.88                   | n.d.                    | Meteor                |
| TPHP sulfate                             | C <sub>18</sub> H <sub>15</sub> O <sub>8</sub> PS                | 422.0225    | [M-H] <sup>-</sup>                                                                  | [M+H] <sup>+</sup><br>[M+Na] <sup>+</sup> | -1.61                   | -0.38                   | Meteor                |
| HO-TPHP sulfate (1)                      | C <sub>18</sub> H <sub>15</sub> O <sub>9</sub> PS                | 438.0169    | [M-H] <sup>-</sup>                                                                  | [M+H] <sup>+</sup><br>[M+Na] <sup>+</sup> | -3.68                   | -1.54                   | untargeted            |
| HO-TPHP sulfate (2)                      | C <sub>18</sub> H <sub>15</sub> O <sub>9</sub> PS                | 438.0169    | [M-H] <sup>-</sup>                                                                  | -                                         | -2.5                    | n.d.                    | untargeted            |
| RDP sulfate                              | C <sub>30</sub> H <sub>24</sub> O <sub>11</sub> P <sub>2</sub> S | 686.0407    | [M-H] <sup>-</sup>                                                                  | -                                         | -1.13                   | n.d.                    | Meteor                |
| HO-RDP sulfate                           | C <sub>30</sub> H <sub>24</sub> O <sub>12</sub> P <sub>2</sub> S | 670.0464    | [M-H] <sup>-</sup>                                                                  | -                                         | -2.67                   | n.d.                    | untargeted            |
| <b>Glucuronidated metabolites</b>        |                                                                  |             |                                                                                     |                                           |                         |                         |                       |
| TPHP glucuronide                         | C <sub>24</sub> H <sub>23</sub> O <sub>11</sub> P                | 518.0978    | [M-H] <sup>-</sup>                                                                  | [M+H] <sup>+</sup><br>[M+Na] <sup>+</sup> | -0.87                   | -1.81                   | Meteor                |
| RDP glucuronide                          | C <sub>36</sub> H <sub>32</sub> O <sub>15</sub> P <sub>2</sub>   | 766.1216    | [M-H] <sup>-</sup>                                                                  | [M+H] <sup>+</sup><br>[M+Na] <sup>+</sup> | -2.23                   | -1.59                   | Meteor                |
| HO-TPHP glucuronide (1)                  | C <sub>24</sub> H <sub>23</sub> O <sub>12</sub> P                | 534.0921    | [M-H] <sup>-</sup>                                                                  | [M+H] <sup>+</sup><br>[M+Na] <sup>+</sup> | -0.57                   | -0.2                    | untargeted            |
| HO-TPHP-HO glucuronide (2)               | C <sub>24</sub> H <sub>23</sub> O <sub>12</sub> P                | 534.0921    | [M-H] <sup>-</sup>                                                                  | [M+H] <sup>+</sup><br>[M+Na] <sup>+</sup> | -1.2                    | -1.8                    | untargeted            |
| HO-RDP-HO glucuronide (1)                | C <sub>36</sub> H <sub>32</sub> O <sub>16</sub> P <sub>2</sub>   | 782.116     | [M-H] <sup>-</sup>                                                                  | [M+H] <sup>+</sup><br>[M+Na] <sup>+</sup> | -1.43                   | -1.77                   | untargeted            |
| HO-RDP-HO glucuronide (2)                | C <sub>36</sub> H <sub>32</sub> O <sub>16</sub> P <sub>2</sub>   | 782.116     | [M-H] <sup>-</sup>                                                                  | [M+H] <sup>+</sup><br>[M+Na] <sup>+</sup> | -1.14                   | -1.35                   | untargeted            |

<sup>a</sup>These compounds were identified by the use of the generated Meteor database in which they are proposed to be formed by phosphatases, however chemical hydrolysis was shown to be the only responsible for their formation and not enzymes under the conditions described in this study; <sup>b</sup>Metabolite corresponding to RDP with the loss of a phenyl group; <sup>c</sup>Metabolite corresponding to RDP-n2 (RDP dimer) with the loss of a phenyl group. Abbreviations: diphenyl phosphate, DPHP; triphenyl phosphate, TPHP; RDP dimer, RDPn2.

**Figure S-1.** Hydrolysis products with (blue dots) and without (red dots) the presence of HLM (0.2 mg/mL) and with increasing RDP amounts (30 min incubation time, average±standard deviation of three independent experiments)

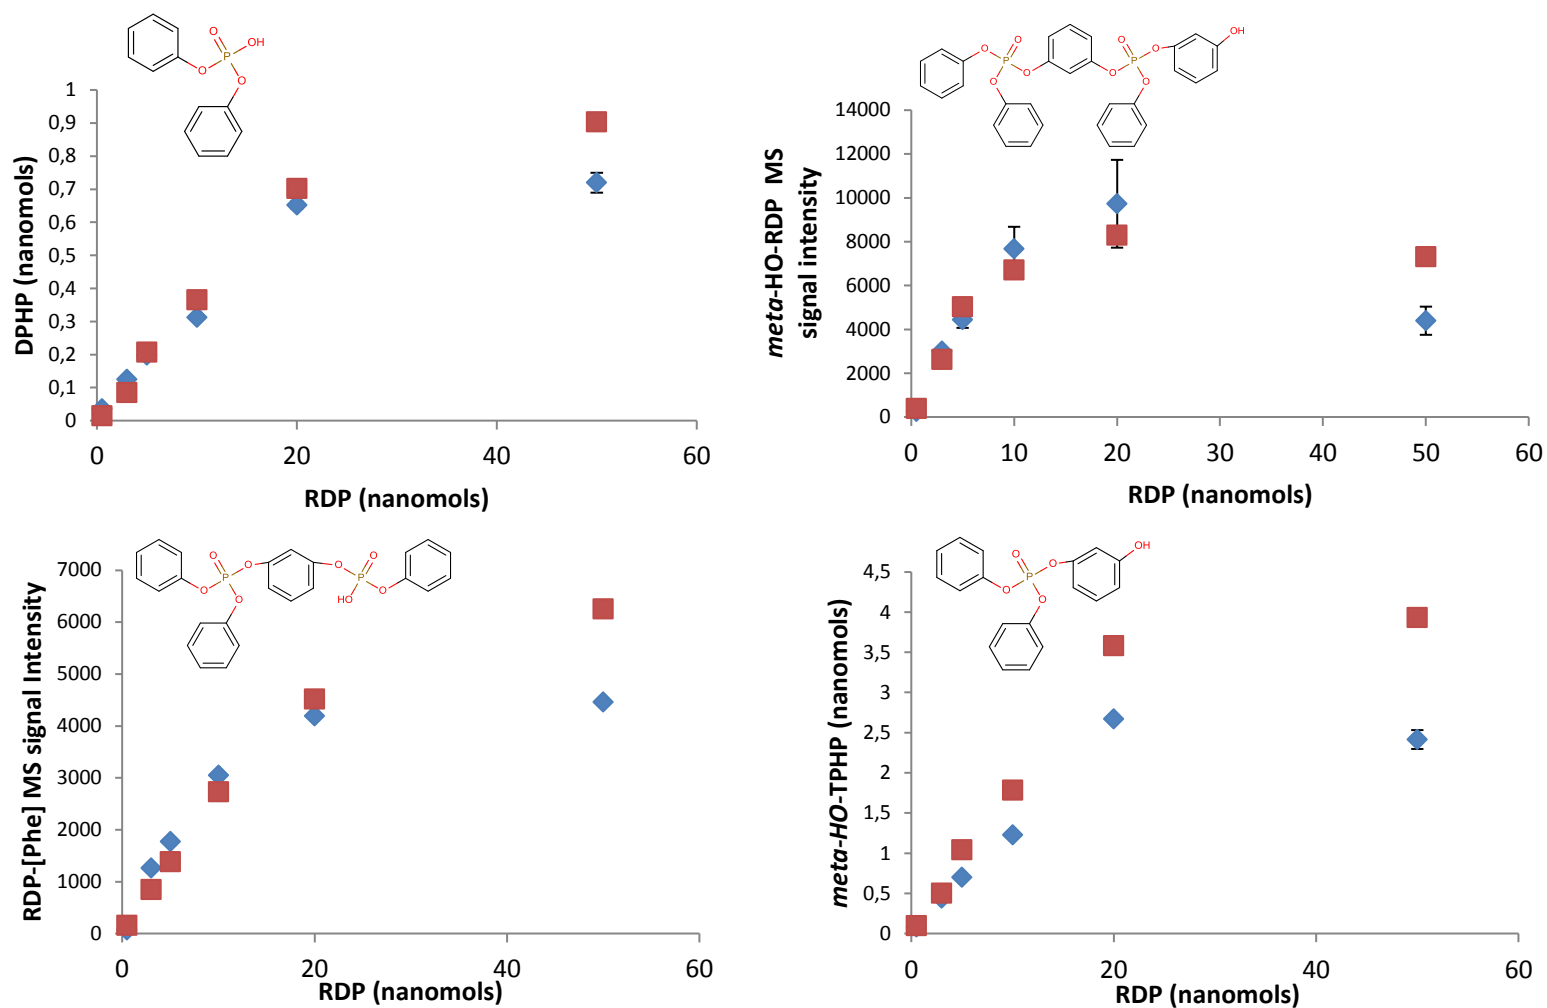

**Figure S-2.** Formation of hydroxy metabolites by changing influential factors (HLM concentration, time and substrate concentration). The y-axis shows the MS signal intensity (average $\pm$ standard deviation of three independent experiments). Time incubation experiments were done with 0.3 mg/mL HLM and 20 nanomols of RDP, the HLM experiments were done at 15 min incubation time and with 20 nanomols of HLM and the experiments concerning the amount of RDP (nanomols of RDP) were done with 0.1 mg/mL of HLM and 15 min incubation time

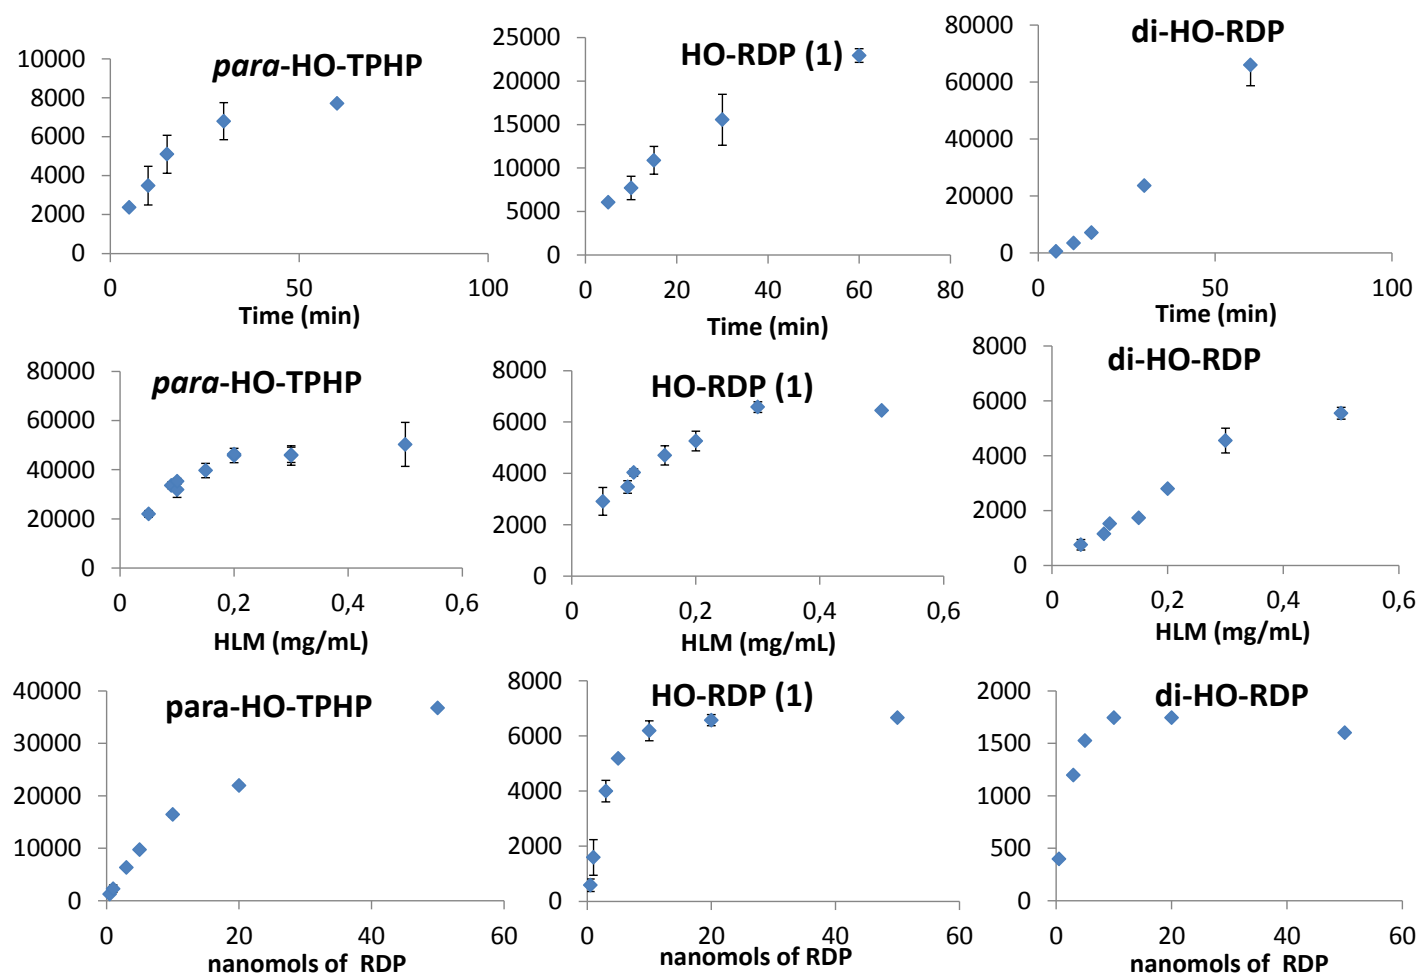

**Figure S-3.** Apparent recovery of some metabolites and compounds of interest with different sample preparation procedures. The apparent recovery is expressed as MS signal abundance adjusted to a percentage of the acetonitrile method workup (considered as 100%). Values are expressed as an average of three independent experiments and bars shows standard deviations. Abbreviations: methyl-tert-butylether, MTBE; solid-phase extraction; diphenyl phosphate, DPHP; triphenyl phosphate, TPHP; phenyl, [Phe]; RDP dimer, RDPn2

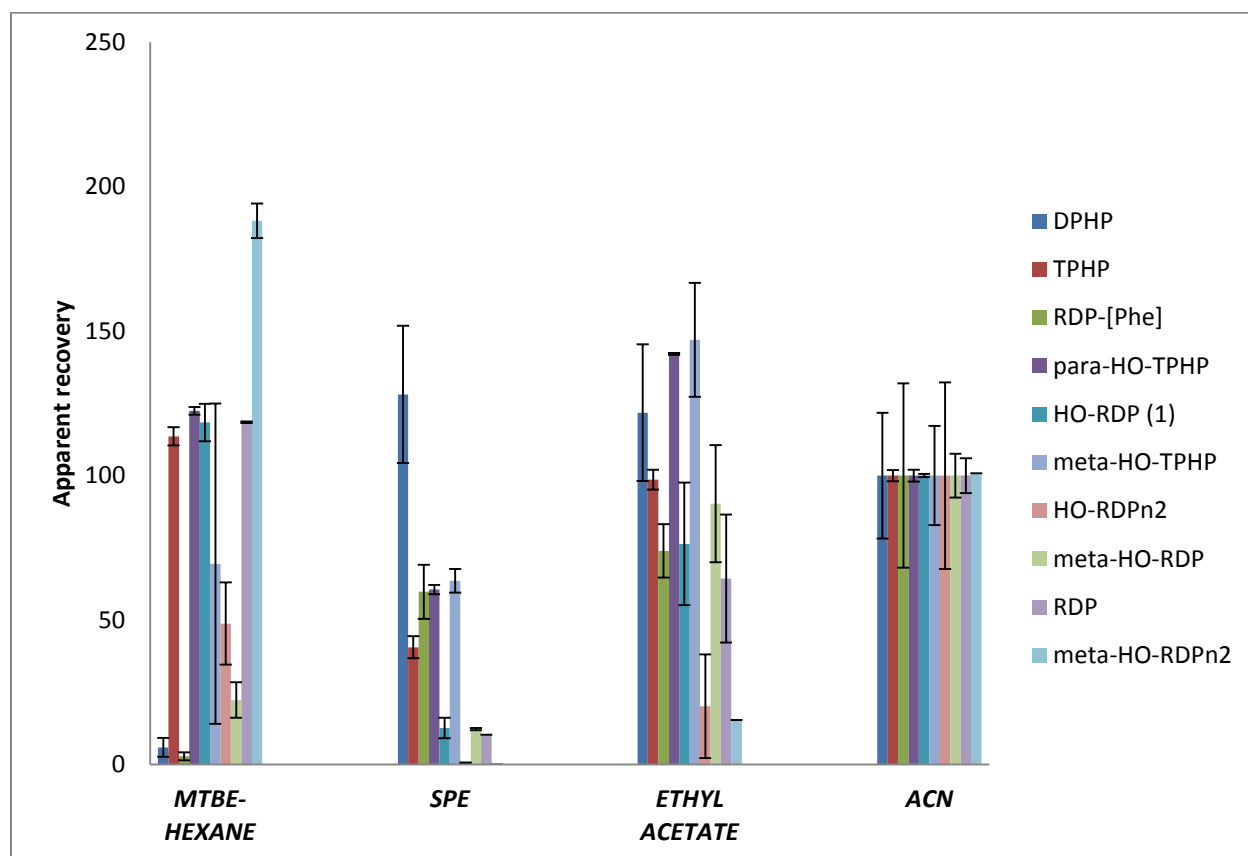

**Figure S-4.** Extracted ion chromatograms (LC-QQQ-ESI-) of the hydroxy metabolites and the hydrolysis products or impurities of RDP

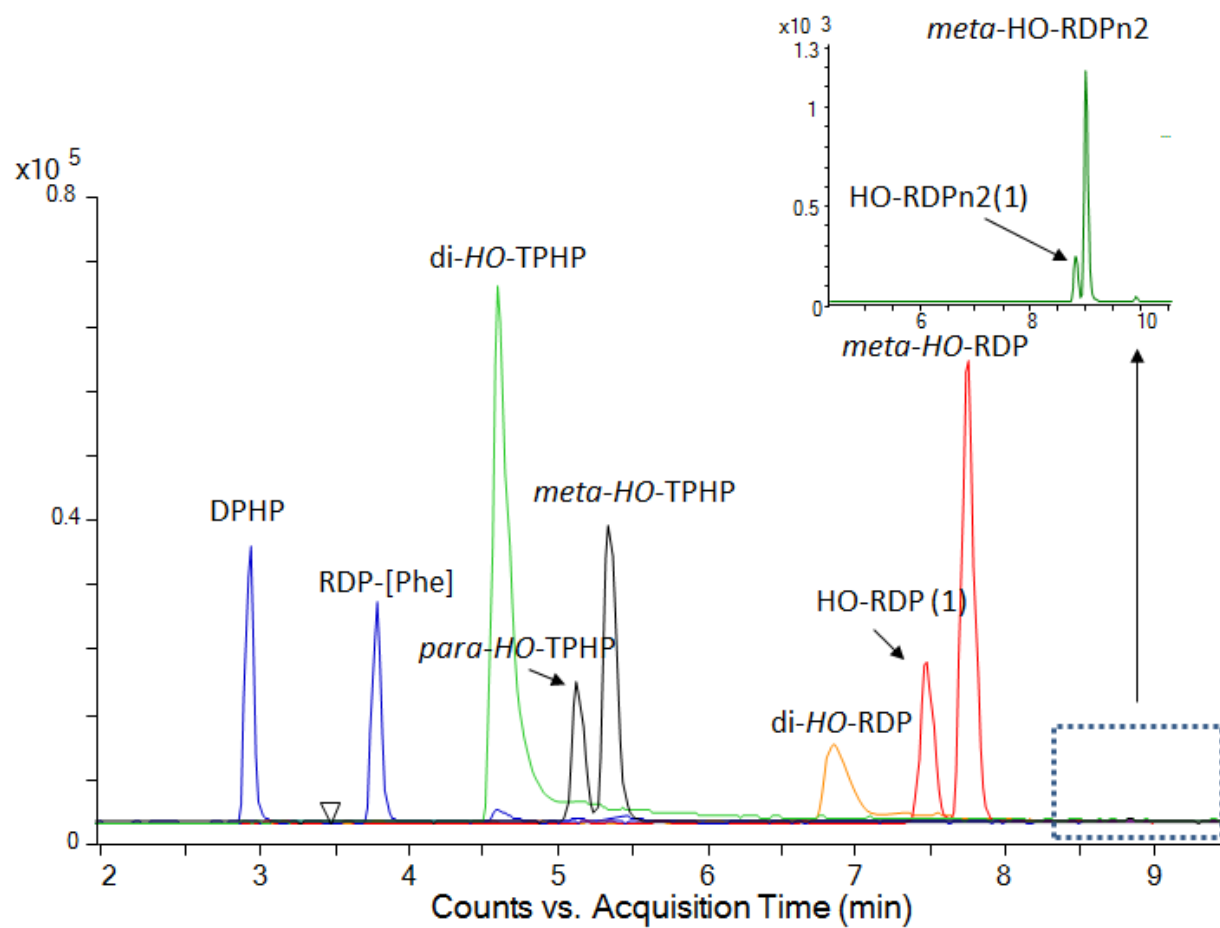



**Figure S-5.** Extracted ion chromatograms (LC-QQQ-ESI-) of the sulfated and glucuronidated metabolites of RDP

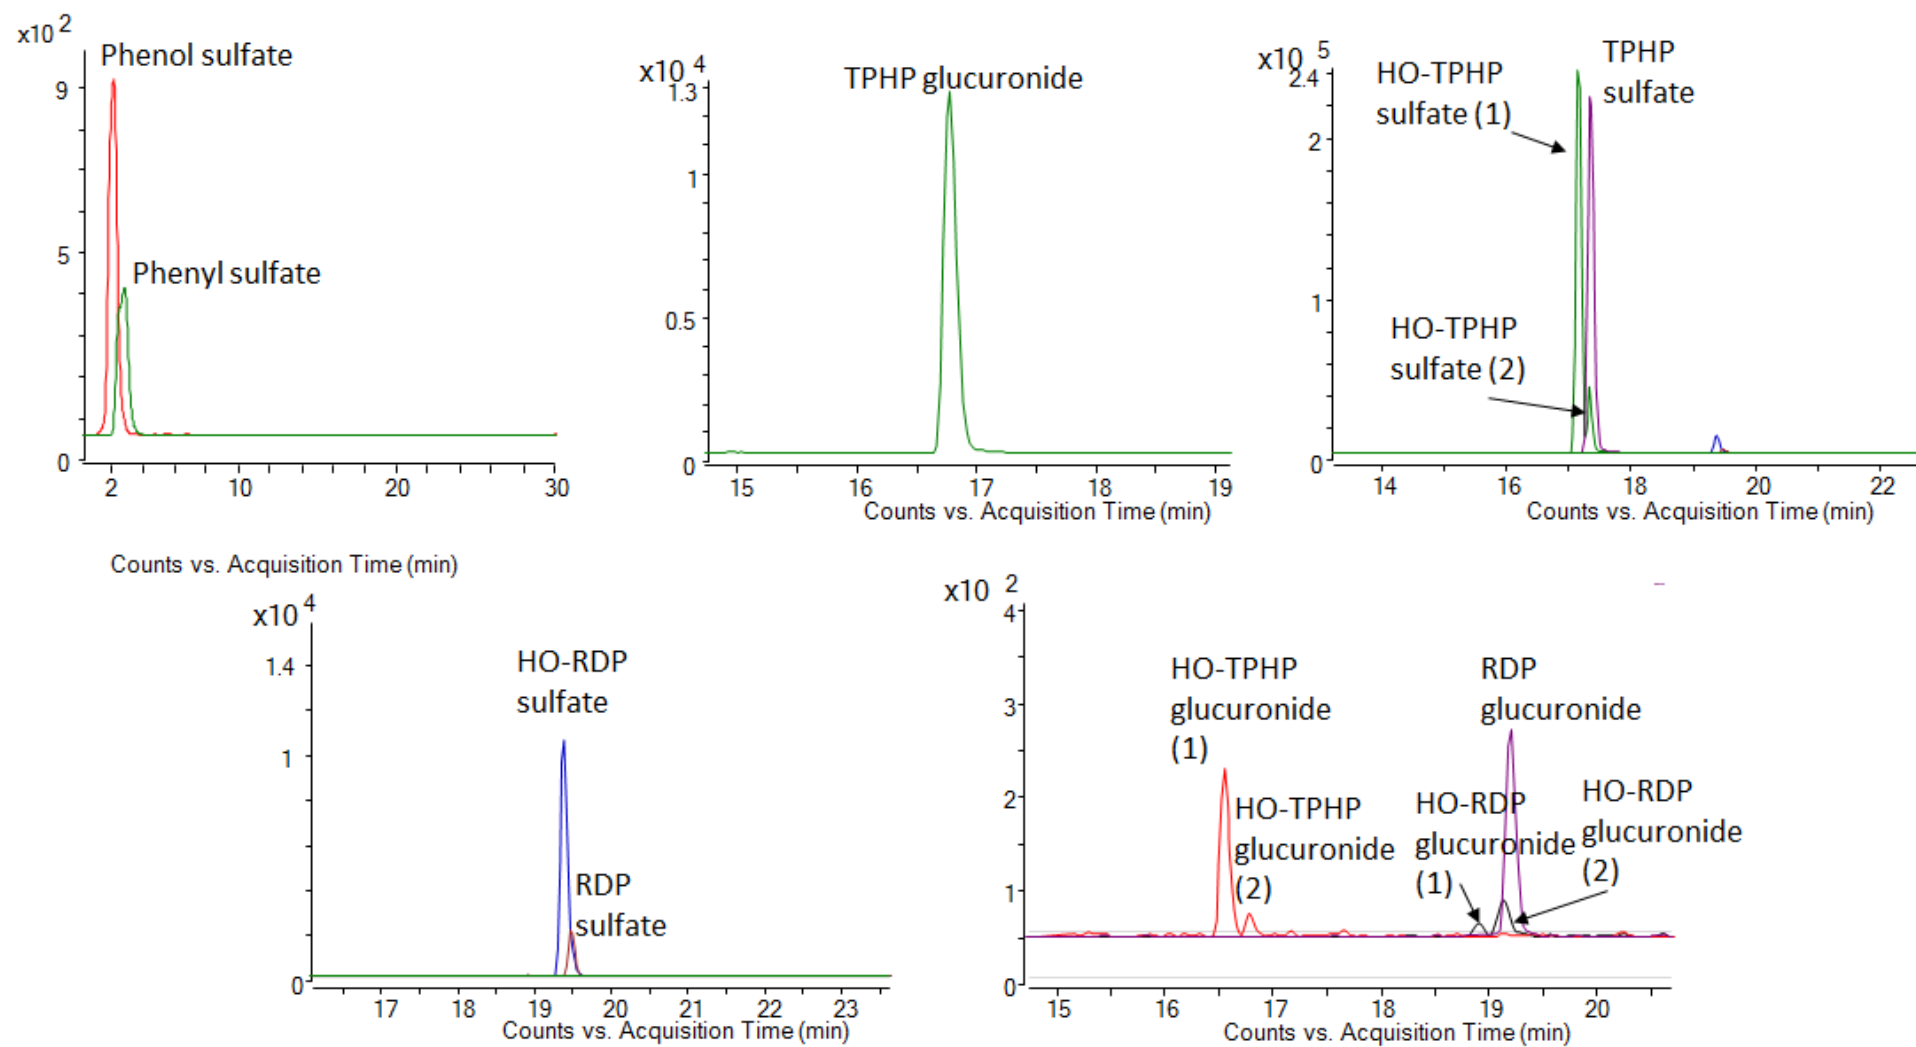

Supplement: Supplementary file 1 [file 3820039]
